# Supplementary material for: Carbon export and fate beneath a dynamic upwelled filament off the California coast
Source: Copernicus journal article supplement (doi:10.5194/bg-18-3053-2021), 2021-05-20
Supplement: Supplementary file 1 [file bg-18-3053-2021-supplement.zip]

Archive with 3 entries (3 files):
- BG-2020_342_BOURNEetal_dive_averaged_ATN_NO_flux_werrs.csv
- BG-2020_342_BOURNEetal_NO3averages.csv
- bg-18-3053-2021-supplement-title-page.pdf
