# Supplementary material for: Carbon export and fate beneath a dynamic upwelled filament off the California coast
Source: Copernicus journal article supplement (doi:10.5194/bg-18-3053-2021), 2021-05-20
Supplement: Supplementary file 1 [file bg-18-3053-2021-supplement.zip › bg-18-3053-2021-supplement-title-page.pdf]

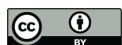

*Supplement of*

## **Carbon export and fate beneath a dynamic upwelled filament off the California coast**

**Hannah L. Bourne et al.**

*Correspondence to:* James K. B. Bishop ([jkbishop@berkeley.edu](mailto:jkbishop@berkeley.edu))

- [bg-18-3053-2021-supplement-title-page.pdf](#)
- [BG-2020\\_342\\_BOURNEetal\\_NO3averages.csv](#)
- [BG-2020\\_342\\_BOURNEetal\\_dive\\_averaged\\_ATN\\_NO\\_flux\\_werrs.csv](#)

The copyright of individual parts of the supplement might differ from the article licence.
