# Supplementary material for: Carbon export and fate beneath a dynamic upwelled filament off the California coast
Source: Copernicus journal article supplement (doi:10.5194/bg-18-3053-2021), 2021-05-20
Supplement: Supplementary file 1 [file bg-18-3053-2021-supplement.zip › BG-2020_342_BOURNEetal_dive_averaged_ATN_NO_flux_werrs.csv]

# deployid - descriptor yyyymmdd_CFExxx
# CFE - cfeNUMBER (1-4)
# dive - CFE dive number
# cycle - CCE_LTER study location number
# ATNFlux1 - Attenuance Flux (units mATN cm-2 cm2 d-1) = POCatnFlux (mmol m-2 d-1)
# ATNflux1N - Flux in size bin normalized to total Flux
# NOflux1 - Number Flux (# m-2 d-1)
# NOflux1N - Number Flux in size bin normalized to total number flux
# press - pressure (dbars) of observation
# temp - temperature (C) of observation
# sal - salinity (PSU)
# cm-sec - rise or sink velocity during dive
# ddaystart - decimal days of year (UTC) since Jan 1 2017 at 0000hrs of start of CFE observation during dive
# ddayend - decimal days of year (UTC) since Jan 1 2017 at 0000hrs of finish of CFE observation during dive
# lat - latitude coordinate corresponding to mid deployment
# long - longitude corrdinate corresponding to mid deployment
# sizecat - size range (in micrometers) for data
# upperecd- upper size limit of size category in micrometers
#
# deployd=ddaysend-ddaysstart
# no=NOflux1*deployd*0.0186
# rsdCT=no^0.5/no
# ATN_Slp_rsd=0.09
# ATNerr=(rsdCT^2+ATN_Slp_rsd^2)^0.5*ATNflux1
deployid	cfe	dive	cycle	ATNflux1	ATNflux1N	NOflux1	NOflux1N	press	temp	sal	cm-sec	ddaysstart	ddaysend	lat	long	sizecat	upperecd	deployd	no	rsdCT	ATN_Slp_rsd	ATNerr
20170611_CFE002	2	51	1	0.459	0.058	2753823	0.7872	35.1	12.436	33.764	-0.14	162.424	162.534	34.9241	-121.2179	30-100	100	0.110001	5634.373047	0.013322	0.090000	0.041760
20170609_CFE002	2	41	1	1.141	0.032	5806610	0.8772	71.9	10.055	33.853	-0.27	160.333	160.499	35.0183	-121.1475	30-100	100	0.166000	17928.488281	0.007468	0.090000	0.103043
20170609_CFE002	2	42	1	0.118	0.001	775834	0.7991	118.7	8.857	33.979	0.00	160.623	160.789	35.0197	-121.1526	30-100	100	0.166000	2395.464844	0.020432	0.090000	0.010890
20170611_CFE002	2	50	1	0.146	0.014	911613	0.7982	131.7	9.010	33.978	0.29	162.091	162.293	34.9308	-121.2024	30-100	100	0.201996	3425.044434	0.017087	0.090000	0.013375
20170611_CFE004	4	50	1	0.075	0.006	398372	0.7861	189.7	8.155	34.007	-0.04	162.076	162.278	34.9346	-121.2078	30-100	100	0.201996	1496.733521	0.025848	0.090000	0.007023
20170610_CFE001	1	226	1	0.040	0.002	216139	0.6506	201.2	8.022	34.001	0.29	161.603	161.770	34.9758	-121.1838	30-100	100	0.167007	671.399109	0.038593	0.090000	0.003917
20170610_CFE001	1	229	1	0.025	0.003	153531	0.7335	201.2	8.022	34.001	0.00	162.395	162.567	34.9173	-121.2113	30-100	100	0.171997	491.167816	0.045122	0.090000	0.002517
20170610_CFE003	3	122	1	0.030	0.001	180492	0.5884	227.9	7.810	34.105	-0.14	161.402	161.569	34.9931	-121.1864	30-100	100	0.167007	560.667786	0.042233	0.090000	0.002982
20170610_CFE003	3	125	1	0.040	0.001	251653	0.6388	246.1	7.720	34.053	0.16	162.139	162.305	34.9193	-121.1909	30-100	100	0.165985	776.933655	0.035876	0.090000	0.003875
20170610_CFE001	1	225	1	0.035	0.001	202094	0.6992	249.1	1.836	19.628	-0.30	161.172	161.443	34.9928	-121.1694	30-100	100	0.270996	1018.660034	0.031332	0.090000	0.003335
20170610_CFE001	1	228	1	0.063	0.002	380990	0.7391	253.6	7.779	34.092	0.05	162.119	162.285	34.9336	-121.2056	30-100	100	0.166000	1176.344604	0.029156	0.090000	0.005960
20170610_CFE003	3	124	1	0.041	0.001	243573	0.6999	277.6	7.574	34.165	0.04	161.888	162.054	34.9313	-121.1917	30-100	100	0.166000	752.055969	0.036465	0.090000	0.003981
20170610_CFE003	3	121	1	0.056	0.002	299430	0.5890	290.9	7.878	34.202	0.09	161.143	161.316	35.0050	-121.1776	30-100	100	0.172989	963.444519	0.032217	0.090000	0.005353
20170611_CFE002	2	51	1	0.842	0.106	555724	0.1589	35.1	12.436	33.764	-0.14	162.424	162.534	34.9241	-121.2179	100-200	200	0.110001	1137.021606	0.029656	0.090000	0.079788
20170609_CFE002	2	41	1	0.889	0.025	644982	0.0974	71.9	10.055	33.853	-0.27	160.333	160.499	35.0183	-121.1475	100-200	200	0.166000	1991.446411	0.022409	0.090000	0.082453
20170609_CFE002	2	42	1	0.245	0.003	108080	0.1113	118.7	8.857	33.979	0.00	160.623	160.789	35.0197	-121.1526	100-200	200	0.166000	333.707794	0.054742	0.090000	0.025809
20170611_CFE002	2	50	1	0.283	0.027	113118	0.0991	131.7	9.010	33.978	0.29	162.091	162.293	34.9308	-121.2024	100-200	200	0.201996	424.998535	0.048507	0.090000	0.028934
20170611_CFE004	4	50	1	0.119	0.009	63248	0.1248	189.7	8.155	34.007	-0.04	162.076	162.278	34.9346	-121.2078	100-200	200	0.201996	237.630676	0.064871	0.090000	0.013202
20170610_CFE001	1	226	1	0.143	0.009	72366	0.2178	201.2	8.022	34.001	0.29	161.603	161.770	34.9758	-121.1838	100-200	200	0.167007	224.792694	0.066697	0.090000	0.016019
20170610_CFE001	1	229	1	0.086	0.010	29163	0.1393	201.2	8.022	34.001	0.00	162.395	162.567	34.9173	-121.2113	100-200	200	0.171997	93.296638	0.103530	0.090000	0.011798
20170610_CFE003	3	122	1	0.140	0.004	58108	0.1894	227.9	7.810	34.105	-0.14	161.402	161.569	34.9931	-121.1864	100-200	200	0.167007	180.502625	0.074432	0.090000	0.016351
20170610_CFE003	3	125	1	0.148	0.004	70834	0.1798	246.1	7.720	34.053	0.16	162.139	162.305	34.9193	-121.1909	100-200	200	0.165985	218.687302	0.067622	0.090000	0.016661
20170610_CFE001	1	225	1	0.112	0.004	39497	0.1367	249.1	1.836	19.628	-0.30	161.172	161.443	34.9928	-121.1694	100-200	200	0.270996	199.085648	0.070873	0.090000	0.012830
20170610_CFE001	1	228	1	0.143	0.005	69982	0.1358	253.6	7.779	34.092	0.05	162.119	162.285	34.9336	-121.2056	100-200	200	0.166000	216.076416	0.068029	0.090000	0.016133
20170610_CFE003	3	124	1	0.149	0.004	58340	0.1676	277.6	7.574	34.165	0.04	161.888	162.054	34.9313	-121.1917	100-200	200	0.166000	180.130569	0.074509	0.090000	0.017409
20170610_CFE003	3	121	1	0.339	0.009	105864	0.2082	290.9	7.878	34.202	0.09	161.143	161.316	35.0050	-121.1776	100-200	200	0.172989	340.627502	0.054183	0.090000	0.035612
20170611_CFE002	2	51	1	1.134	0.143	142649	0.0408	35.1	12.436	33.764	-0.14	162.424	162.534	34.9241	-121.2179	200-400	400	0.110001	291.862488	0.058534	0.090000	0.121747
20170609_CFE002	2	41	1	2.439	0.069	126550	0.0191	71.9	10.055	33.853	-0.27	160.333	160.499	35.0183	-121.1475	200-400	400	0.166000	390.735748	0.050589	0.090000	0.251811
20170609_CFE002	2	42	1	1.500	0.017	68676	0.0707	118.7	8.857	33.979	0.00	160.623	160.789	35.0197	-121.1526	200-400	400	0.166000	212.044022	0.068673	0.090000	0.169812
20170611_CFE002	2	50	1	2.461	0.236	107365	0.0940	131.7	9.010	33.978	0.29	162.091	162.293	34.9308	-121.2024	200-400	400	0.201996	403.383789	0.049790	0.090000	0.253125
20170611_CFE004	4	50	1	0.860	0.066	36805	0.0726	189.7	8.155	34.007	-0.04	162.076	162.278	34.9346	-121.2078	200-400	400	0.201996	138.281006	0.085039	0.090000	0.106486
20170610_CFE001	1	226	1	0.755	0.047	28410	0.0855	201.2	8.022	34.001	0.29	161.603	161.770	34.9758	-121.1838	200-400	400	0.167007	88.250839	0.106449	0.090000	0.105244
20170610_CFE001	1	229	1	0.535	0.059	18683	0.0893	201.2	8.022	34.001	0.00	162.395	162.567	34.9173	-121.2113	200-400	400	0.171997	59.769611	0.129348	0.090000	0.084304
20170610_CFE003	3	122	1	1.140	0.032	46323	0.1510	227.9	7.810	34.105	-0.14	161.402	161.569	34.9931	-121.1864	200-400	400	0.167007	143.894531	0.083364	0.090000	0.139851
20170610_CFE003	3	125	1	1.396	0.038	51670	0.1312	246.1	7.720	34.053	0.16	162.139	162.305	34.9193	-121.1909	200-400	400	0.165985	159.521881	0.079175	0.090000	0.167338
20170610_CFE001	1	225	1	0.997	0.034	33690	0.1166	249.1	1.836	19.628	-0.30	161.172	161.443	34.9928	-121.1694	200-400	400	0.270996	169.815308	0.076738	0.090000	0.117919
20170610_CFE001	1	228	1	1.533	0.056	46628	0.0905	253.6	7.779	34.092	0.05	162.119	162.285	34.9336	-121.2056	200-400	400	0.166000	143.968613	0.083342	0.090000	0.188040
20170610_CFE003	3	124	1	0.781	0.020	27680	0.0795	277.6	7.574	34.165	0.04	161.888	162.054	34.9313	-121.1917	200-400	400	0.166000	85.464767	0.108170	0.090000	0.109899
20170610_CFE003	3	121	1	1.457	0.040	76002	0.1495	290.9	7.878	34.202	0.09	161.143	161.316	35.0050	-121.1776	200-400	400	0.172989	244.543686	0.063947	0.090000	0.160860
20170611_CFE002	2	51	1	1.604	0.202	39309	0.0112	35.1	12.436	33.764	-0.14	162.424	162.534	34.9241	-121.2179	400-1000	1000	0.110001	80.426949	0.111506	0.090000	0.229846
20170609_CFE002	2	41	1	1.677	0.048	25402	0.0038	71.9	10.055	33.853	-0.27	160.333	160.499	35.0183	-121.1475	400-1000	1000	0.166000	78.431213	0.112916	0.090000	0.242151
20170609_CFE002	2	42	1	0.932	0.010	12561	0.0129	118.7	8.857	33.979	0.00	160.623	160.789	35.0197	-121.1526	400-1000	1000	0.166000	38.783344	0.160575	0.090000	0.171560
20170611_CFE002	2	50	1	0.624	0.060	6423	0.0056	131.7	9.010	33.978	0.29	162.091	162.293	34.9308	-121.2024	400-1000	1000	0.201996	24.132017	0.203565	0.090000	0.138886
20170611_CFE004	4	50	1	0.541	0.041	4940	0.0098	189.7	8.155	34.007	-0.04	162.076	162.278	34.9346	-121.2078	400-1000	1000	0.201996	18.560200	0.232118	0.090000	0.134685
20170610_CFE001	1	226	1	0.880	0.054	6771	0.0204	201.2	8.022	34.001	0.29	161.603	161.770	34.9758	-121.1838	400-1000	1000	0.167007	21.032963	0.218047	0.090000	0.207584
20170610_CFE001	1	229	1	0.210	0.023	2501	0.0120	201.2	8.022	34.001	0.00	162.395	162.567	34.9173	-121.2113	400-1000	1000	0.171997	8.001060	0.353530	0.090000	0.076609
20170610_CFE003	3	122	1	1.339	0.037	9366	0.0305	227.9	7.810	34.105	-0.14	161.402	161.569	34.9931	-121.1864	400-1000	1000	0.167007	29.093887	0.185395	0.090000	0.275949
20170610_CFE003	3	125	1	0.756	0.021	5797	0.0147	246.1	7.720	34.053	0.16	162.139	162.305	34.9193	-121.1909	400-1000	1000	0.165985	17.897202	0.236378	0.090000	0.191217
20170610_CFE001	1	225	1	1.250	0.043	7880	0.0273	249.1	1.836	19.628	-0.30	161.172	161.443	34.9928	-121.1694	400-1000	1000	0.270996	39.719341	0.158672	0.090000	0.228024
20170610_CFE001	1	228	1	0.703	0.026	5199	0.0101	253.6	7.779	34.092	0.05	162.119	162.285	34.9336	-121.2056	400-1000	1000	0.166000	16.052433	0.249591	0.090000	0.186521
20170610_CFE003	3	124	1	0.845	0.022	7813	0.0225	277.6	7.574	34.165	0.04	161.888	162.054	34.9313	-121.1917	400-1000	1000	0.166000	24.123419	0.203601	0.090000	0.188102
20170610_CFE003	3	121	1	2.731	0.076	13149	0.0259	290.9	7.878	34.202	0.09	161.143	161.316	35.0050	-121.1776	400-1000	1000	0.172989	42.308163	0.153740	0.090000	0.486517
20170611_CFE002	2	51	1	3.912	0.492	6954	0.0020	35.1	12.436	33.764	-0.14	162.424	162.534	34.9241	-121.2179	1000-10000	10000	0.110001	14.228014	0.265111	0.090000	1.095247
20170609_CFE002	2	41	1	28.988	0.825	15783	0.0024	71.9	10.055	33.853	-0.27	160.333	160.499	35.0183	-121.1475	1000-10000	10000	0.166000	48.731586	0.143250	0.090000	4.904078
20170609_CFE002	2	42	1	86.986	0.969	5771	0.0059	118.7	8.857	33.979	0.00	160.623	160.789	35.0197	-121.1526	1000-10000	10000	0.166000	17.818539	0.236899	0.090000	22.043896
20170611_CFE002	2	50	1	6.914	0.663	3523	0.0031	131.7	9.010	33.978	0.29	162.091	162.293	34.9308	-121.2024	1000-10000	10000	0.201996	13.236353	0.274863	0.090000	1.999685
20170611_CFE004	4	50	1	11.455	0.878	3388	0.0067	189.7	8.155	34.007	-0.04	162.076	162.278	34.9346	-121.2078	1000-10000	10000	0.201996	12.729141	0.280285	0.090000	3.372125
20170610_CFE001	1	226	1	14.385	0.888	8537	0.0257	201.2	8.022	34.001	0.29	161.603	161.770	34.9758	-121.1838	1000-10000	10000	0.167007	26.518742	0.194189	0.090000	3.078839
20170610_CFE001	1	229	1	8.181	0.905	5446	0.0260	201.2	8.022	34.001	0.00	162.395	162.567	34.9173	-121.2113	1000-10000	10000	0.171997	17.422539	0.239577	0.090000	2.093715
20170610_CFE003	3	122	1	33.347	0.926	12481	0.0407	227.9	7.810	34.105	-0.14	161.402	161.569	34.9931	-121.1864	1000-10000	10000	0.167007	38.770107	0.160602	0.090000	6.139200
20170610_CFE003	3	125	1	34.008	0.936	13992	0.0355	246.1	7.720	34.053	0.16	162.139	162.305	34.9193	-121.1909	1000-10000	10000	0.165985	43.197796	0.152149	0.090000	6.011757
20170610_CFE001	1	225	1	26.580	0.917	5871	0.0203	249.1	1.836	19.628	-0.30	161.172	161.443	34.9928	-121.1694	1000-10000	10000	0.270996	29.592928	0.183826	0.090000	5.440271
20170610_CFE001	1	228	1	25.074	0.911	12656	0.0246	253.6	7.779	34.092	0.05	162.119	162.285	34.9336	-121.2056	1000-10000	10000	0.166000	39.076664	0.159971	0.090000	4.602341
20170610_CFE003	3	124	1	36.777	0.953	10612	0.0305	277.6	7.574	34.165	0.04	161.888	162.054	34.9313	-121.1917	1000-10000	10000	0.166000	32.765610	0.174699	0.090000	7.227381
20170610_CFE003	3	121	1	31.447	0.873	13962	0.0275	290.9	7.878	34.202	0.09	161.143	161.316	35.0050	-121.1776	1000-10000	10000	0.172989	44.924068	0.149197	0.090000	5.479341
20170614_CFE002	2	62	2	0.118	0.011	696645	0.6455	97.6	9.498	33.964	-0.04	165.716	165.882	34.8606	-122.2621	30-100	100	0.166000	2150.960938	0.021562	0.090000	0.010921
20170614_CFE002	2	61	2	0.103	0.013	657772	0.7418	113.1	9.352	34.024	0.12	165.406	165.572	34.8350	-122.1842	30-100	100	0.166000	2030.936768	0.022190	0.090000	0.009548
20170614_CFE002	2	60	2	0.067	0.006	413108	0.4523	142.9	9.175	34.096	0.05	165.047	165.262	34.8017	-122.1022	30-100	100	0.214996	1651.988037	0.024603	0.090000	0.006251
20170616_CFE004	4	71	2	0.083	0.009	435036	0.4905	144.1	9.091	34.031	0.08	167.044	167.209	34.7056	-122.3636	30-100	100	0.164993	1335.068970	0.027368	0.090000	0.007808
20170616_CFE004	4	72	2	0.106	0.015	568335	0.6309	147	8.673	34.013	-0.01	167.364	167.529	34.7055	-122.3999	30-100	100	0.165009	1744.315308	0.023943	0.090000	0.009872
20170614_CFE004	4	62	2	0.050	0.005	335523	0.6140	149.2	9.199	34.084	0.00	165.739	165.937	34.8663	-122.2743	30-100	100	0.197998	1235.651611	0.028448	0.090000	0.004719
20170613_CFE001	1	243	2	0.077	0.010	465503	0.7546	150	9.065	34.090	0.00	165.223	165.471	34.8459	-122.0672	30-100	100	0.247986	2147.151123	0.021581	0.090000	0.007126
20170613_CFE001	1	246	2	0.076	0.005	436677	0.6873	150.8	9.057	34.099	0.04	166.439	166.688	34.9275	-122.2670	30-100	100	0.249008	2022.490723	0.022236	0.090000	0.007046
20170616_CFE002	2	72	2	0.157	0.008	884690	0.6187	151.3	8.582	34.008	-0.05	167.350	167.516	34.7054	-122.3950	30-100	100	0.166000	2731.568604	0.019133	0.090000	0.014446
20170614_CFE004	4	61	2	0.056	0.009	364894	0.5972	152.8	9.124	34.113	0.06	165.430	165.596	34.8347	-122.1928	30-100	100	0.166000	1126.646729	0.029792	0.090000	0.005309
20170616_CFE002	2	71	2	0.050	0.004	273555	0.3618	156.8	8.605	33.988	-0.04	167.034	167.200	34.7040	-122.3570	30-100	100	0.166000	844.628418	0.034409	0.090000	0.004818
20170613_CFE003	3	144	2	0.101	0.003	659444	0.7308	157.9	9.002	34.117	-0.05	166.984	167.233	34.9377	-122.3663	30-100	100	0.249008	3054.247070	0.018095	0.090000	0.009272
20170616_CFE004	4	70	2	0.079	0.009	461950	0.5857	158.2	8.566	34.030	0.07	166.673	166.895	34.7067	-122.3233	30-100	100	0.222000	1907.483887	0.022897	0.090000	0.007336
20170614_CFE004	4	60	2	0.047	0.009	295023	0.5993	160.7	9.112	34.116	0.12	165.060	165.277	34.7979	-122.1021	30-100	100	0.216995	1190.744385	0.028979	0.090000	0.004444
20170613_CFE003	3	141	2	0.061	0.005	401258	0.7385	162.5	9.018	34.113	0.05	165.829	166.078	34.8846	-122.1689	30-100	100	0.249008	1858.446045	0.023197	0.090000	0.005669
20170616_CFE002	2	70	2	0.052	0.004	288464	0.3735	164.4	8.402	34.013	0.19	166.659	166.881	34.7042	-122.3195	30-100	100	0.222000	1191.125610	0.028975	0.090000	0.004917
20170613_CFE003	3	138	2	0.084	0.005	523016	0.7719	170.3	8.942	34.131	0.13	164.639	164.889	34.7984	-121.9447	30-100	100	0.250000	2432.024414	0.020278	0.090000	0.007750
20170613_CFE001	1	245	2	0.057	0.002	393580	0.7771	247.7	8.565	34.116	0.03	166.022	166.271	34.9056	-122.1917	30-100	100	0.248993	1822.775146	0.023423	0.090000	0.005301
20170613_CFE001	1	242	2	0.044	0.003	316828	0.8317	252.7	8.453	34.146	0.04	164.805	165.053	34.7990	-121.9838	30-100	100	0.248001	1461.469971	0.026158	0.090000	0.004124
20170613_CFE001	1	248	2	0.078	0.002	475528	0.7150	253	#N/A	#N/A	#N/A	167.248	167.590	34.9710	-122.3814	30-100	100	0.341995	3024.884521	0.018182	0.090000	0.007162
20170613_CFE003	3	143	2	0.066	0.002	451259	0.7548	257.2	8.620	34.178	-0.02	166.627	166.876	34.9281	-122.2950	30-100	100	0.249008	2090.028076	0.021874	0.090000	0.006113
20170613_CFE003	3	140	2	0.041	0.001	307958	0.6993	261.2	8.471	34.187	-0.02	165.473	165.721	34.8548	-122.0970	30-100	100	0.247986	1420.468506	0.026533	0.090000	0.003847
20170613_CFE003	3	137	2	0.052	0.002	327477	0.7214	267.4	8.437	34.193	0.07	164.249	164.536	34.7610	-121.8794	30-100	100	0.287003	1748.156006	0.023917	0.090000	0.004842
20170613_CFE003	3	145	2	0.020	0.002	125586	0.7277	501.6	6.384	34.277	-0.35	167.410	167.596	34.9518	-122.4319	30-100	100	0.185989	434.451660	0.047977	0.090000	0.002040
20170613_CFE001	1	244	2	0.038	0.002	233377	0.7304	505.7	6.365	34.276	0.00	165.626	165.875	34.8811	-122.1311	30-100	100	0.248993	1080.831787	0.030417	0.090000	0.003610
20170613_CFE003	3	142	2	0.044	0.001	291535	0.6447	506	6.355	34.283	-0.05	166.235	166.484	34.9133	-122.2339	30-100	100	0.248993	1350.177246	0.027215	0.090000	0.004137
20170613_CFE003	3	139	2	0.048	0.001	302944	0.6297	509.2	6.294	34.286	0.20	165.092	165.341	34.8308	-122.0158	30-100	100	0.249008	1403.099854	0.026697	0.090000	0.004506
20170613_CFE001	1	247	2	0.045	0.002	268657	0.7183	514.2	6.274	34.293	0.05	166.850	167.099	34.9481	-122.3340	30-100	100	0.248993	1244.223022	0.028350	0.090000	0.004246
20170613_CFE001	1	241	2	0.044	0.001	237848	0.7139	517.9	4.376	29.173	0.02	164.230	164.601	34.7607	-121.8885	30-100	100	0.371002	1641.302612	0.024683	0.090000	0.004106
20170614_CFE002	2	62	2	0.351	0.034	122032	0.1131	97.6	9.498	33.964	-0.04	165.716	165.882	34.8606	-122.2621	100-200	200	0.166000	376.785980	0.051517	0.090000	0.036399
20170614_CFE002	2	61	2	0.266	0.032	101471	0.1144	113.1	9.352	34.024	0.12	165.406	165.572	34.8350	-122.1842	100-200	200	0.166000	313.301849	0.056496	0.090000	0.028266
20170614_CFE002	2	60	2	0.340	0.030	72766	0.0797	142.9	9.175	34.096	0.05	165.047	165.262	34.8017	-122.1022	100-200	200	0.214996	290.985809	0.058622	0.090000	0.036519
20170616_CFE004	4	71	2	0.338	0.035	122701	0.1384	144.1	9.091	34.031	0.08	167.044	167.209	34.7056	-122.3636	100-200	200	0.164993	376.553406	0.051533	0.090000	0.035054
20170616_CFE004	4	72	2	0.419	0.061	176657	0.1961	147	8.673	34.013	-0.01	167.364	167.529	34.7055	-122.3999	100-200	200	0.165009	542.189941	0.042946	0.090000	0.041783
20170614_CFE004	4	62	2	0.171	0.018	77022	0.1410	149.2	9.199	34.084	0.00	165.739	165.937	34.8663	-122.2743	100-200	200	0.197998	283.653748	0.059375	0.090000	0.018437
20170613_CFE001	1	243	2	0.178	0.023	67213	0.1090	150	9.065	34.090	0.00	165.223	165.471	34.8459	-122.0672	100-200	200	0.247986	310.022614	0.056794	0.090000	0.018943
20170613_CFE001	1	246	2	0.259	0.016	91448	0.1439	150.8	9.057	34.099	0.04	166.439	166.688	34.9275	-122.2670	100-200	200	0.249008	423.545868	0.048590	0.090000	0.026490
20170616_CFE002	2	72	2	0.557	0.030	253295	0.1771	151.3	8.582	34.008	-0.05	167.350	167.516	34.7054	-122.3950	100-200	200	0.166000	782.073608	0.035758	0.090000	0.053942
20170614_CFE004	4	61	2	0.221	0.037	81678	0.1337	152.8	9.124	34.113	0.06	165.430	165.596	34.8347	-122.1928	100-200	200	0.166000	252.188995	0.062970	0.090000	0.024275
20170616_CFE002	2	71	2	0.213	0.018	85975	0.1137	156.8	8.605	33.988	-0.04	167.034	167.200	34.7040	-122.3570	100-200	200	0.166000	265.456390	0.061377	0.090000	0.023203
20170613_CFE003	3	144	2	0.271	0.008	113292	0.1256	157.9	9.002	34.117	-0.05	166.984	167.233	34.9377	-122.3663	100-200	200	0.249008	524.717468	0.043655	0.090000	0.027108
20170616_CFE004	4	70	2	0.326	0.037	116401	0.1476	158.2	8.566	34.030	0.07	166.673	166.895	34.7067	-122.3233	100-200	200	0.222000	480.643005	0.045613	0.090000	0.032893
20170614_CFE004	4	60	2	0.164	0.032	61309	0.1245	160.7	9.112	34.116	0.12	165.060	165.277	34.7979	-122.1021	100-200	200	0.216995	247.449677	0.063571	0.090000	0.018071
20170613_CFE003	3	141	2	0.131	0.011	56209	0.1035	162.5	9.018	34.113	0.05	165.829	166.078	34.8846	-122.1689	100-200	200	0.249008	260.334717	0.061977	0.090000	0.014315
20170616_CFE002	2	70	2	0.524	0.041	119104	0.1542	164.4	8.402	34.013	0.19	166.659	166.881	34.7042	-122.3195	100-200	200	0.222000	491.804230	0.045092	0.090000	0.052748
20170613_CFE003	3	138	2	0.176	0.011	79307	0.1171	170.3	8.942	34.131	0.13	164.639	164.889	34.7984	-121.9447	100-200	200	0.250000	368.777557	0.052074	0.090000	0.018300
20170613_CFE001	1	245	2	0.157	0.006	56743	0.1120	247.7	8.565	34.116	0.03	166.022	166.271	34.9056	-122.1917	100-200	200	0.248993	262.792145	0.061687	0.090000	0.017130
20170613_CFE001	1	242	2	0.074	0.004	32237	0.0846	252.7	8.453	34.146	0.04	164.805	165.053	34.7990	-121.9838	100-200	200	0.248001	148.703430	0.082005	0.090000	0.009010
20170613_CFE001	1	248	2	0.208	0.006	101526	0.1526	253	#N/A	#N/A	#N/A	167.248	167.590	34.9710	-122.3814	100-200	200	0.341995	645.817749	0.039350	0.090000	0.020431
20170613_CFE003	3	143	2	0.145	0.004	70042	0.1172	257.2	8.620	34.178	-0.02	166.627	166.876	34.9281	-122.2950	100-200	200	0.249008	324.402924	0.055521	0.090000	0.015333
20170613_CFE003	3	140	2	0.145	0.004	55543	0.1261	261.2	8.471	34.187	-0.02	165.473	165.721	34.8548	-122.0970	100-200	200	0.247986	256.194305	0.062476	0.090000	0.015886
20170613_CFE003	3	137	2	0.161	0.006	71619	0.1578	267.4	8.437	34.193	0.07	164.249	164.536	34.7610	-121.8794	100-200	200	0.287003	382.320557	0.051143	0.090000	0.016666
20170613_CFE003	3	145	2	0.047	0.004	25801	0.1495	501.6	6.384	34.277	-0.35	167.410	167.596	34.9518	-122.4319	100-200	200	0.185989	89.255859	0.105848	0.090000	0.006530
20170613_CFE001	1	244	2	0.083	0.003	42647	0.1335	505.7	6.365	34.276	0.00	165.626	165.875	34.8811	-122.1311	100-200	200	0.248993	197.509766	0.071155	0.090000	0.009523
20170613_CFE003	3	142	2	0.161	0.005	77962	0.1724	506	6.355	34.283	-0.05	166.235	166.484	34.9133	-122.2339	100-200	200	0.248993	361.063049	0.052627	0.090000	0.016785
20170613_CFE003	3	139	2	0.157	0.002	74572	0.1550	509.2	6.294	34.286	0.20	165.092	165.341	34.8308	-122.0158	100-200	200	0.249008	345.383881	0.053808	0.090000	0.016463
20170613_CFE001	1	247	2	0.114	0.006	62345	0.1667	514.2	6.274	34.293	0.05	166.850	167.099	34.9481	-122.3340	100-200	200	0.248993	288.736511	0.058850	0.090000	0.012259
20170613_CFE001	1	241	2	0.101	0.002	52595	0.1579	517.9	4.376	29.173	0.02	164.230	164.601	34.7607	-121.8885	100-200	200	0.371002	362.938995	0.052491	0.090000	0.010523
20170614_CFE002	2	62	2	6.230	0.602	246221	0.2281	97.6	9.498	33.964	-0.04	165.716	165.882	34.8606	-122.2621	200-400	400	0.166000	760.231934	0.036268	0.090000	0.604514
20170614_CFE002	2	61	2	2.896	0.352	112838	0.1273	113.1	9.352	34.024	0.12	165.406	165.572	34.8350	-122.1842	200-400	400	0.166000	348.398590	0.053575	0.090000	0.303324
20170614_CFE002	2	60	2	10.374	0.913	421004	0.4609	142.9	9.175	34.096	0.05	165.047	165.262	34.8017	-122.1022	200-400	400	0.214996	1683.563599	0.024372	0.090000	0.967288
20170616_CFE004	4	71	2	7.075	0.730	319403	0.3601	144.1	9.091	34.031	0.08	167.044	167.209	34.7056	-122.3636	200-400	400	0.164993	980.206299	0.031940	0.090000	0.675659
20170616_CFE004	4	72	2	2.654	0.385	146611	0.1628	147	8.673	34.013	-0.01	167.364	167.529	34.7055	-122.3999	200-400	400	0.165009	449.973694	0.047142	0.090000	0.269644
20170614_CFE004	4	62	2	2.772	0.285	122716	0.2246	149.2	9.199	34.084	0.00	165.739	165.937	34.8663	-122.2743	200-400	400	0.197998	451.933929	0.047039	0.090000	0.281500
20170613_CFE001	1	243	2	2.144	0.272	74030	0.1200	150	9.065	34.090	0.00	165.223	165.471	34.8459	-122.0672	200-400	400	0.247986	341.466309	0.054116	0.090000	0.225156
20170613_CFE001	1	246	2	2.532	0.152	92556	0.1457	150.8	9.057	34.099	0.04	166.439	166.688	34.9275	-122.2670	200-400	400	0.249008	428.677612	0.048299	0.090000	0.258621
20170616_CFE002	2	72	2	5.148	0.273	259389	0.1814	151.3	8.582	34.008	-0.05	167.350	167.516	34.7054	-122.3950	200-400	400	0.166000	800.889465	0.035336	0.090000	0.497752
20170614_CFE004	4	61	2	3.317	0.550	159119	0.2604	152.8	9.124	34.113	0.06	165.430	165.596	34.8347	-122.1928	200-400	400	0.166000	491.295837	0.045116	0.090000	0.333939
20170616_CFE002	2	71	2	10.346	0.885	386030	0.5106	156.8	8.605	33.988	-0.04	167.034	167.200	34.7040	-122.3570	200-400	400	0.166000	1191.906128	0.028965	0.090000	0.978174
20170613_CFE003	3	144	2	2.734	0.082	109465	0.1213	157.9	9.002	34.117	-0.05	166.984	167.233	34.9377	-122.3663	200-400	400	0.249008	506.992493	0.044412	0.090000	0.274388
20170616_CFE004	4	70	2	4.010	0.451	199577	0.2531	158.2	8.566	34.030	0.07	166.673	166.895	34.7067	-122.3233	200-400	400	0.222000	824.093323	0.034835	0.090000	0.386991
20170614_CFE004	4	60	2	2.937	0.578	129825	0.2637	160.7	9.112	34.116	0.12	165.060	165.277	34.7979	-122.1021	200-400	400	0.216995	523.987610	0.043686	0.090000	0.293824
20170613_CFE003	3	141	2	1.970	0.170	69658	0.1282	162.5	9.018	34.113	0.05	165.829	166.078	34.8846	-122.1689	200-400	400	0.249008	322.624420	0.055674	0.090000	0.208481
20170616_CFE002	2	70	2	8.682	0.672	357288	0.4626	164.4	8.402	34.013	0.19	166.659	166.881	34.7042	-122.3195	200-400	400	0.222000	1475.313599	0.026035	0.090000	0.813417
20170613_CFE003	3	138	2	1.296	0.081	54927	0.0811	170.3	8.942	34.131	0.13	164.639	164.889	34.7984	-121.9447	200-400	400	0.250000	255.410553	0.062572	0.090000	0.142060
20170613_CFE001	1	245	2	0.908	0.035	34174	0.0675	247.7	8.565	34.116	0.03	166.022	166.271	34.9056	-122.1917	200-400	400	0.248993	158.269012	0.079488	0.090000	0.109029
20170613_CFE001	1	242	2	0.287	0.016	12748	0.0335	252.7	8.453	34.146	0.04	164.805	165.053	34.7990	-121.9838	200-400	400	0.248001	58.804211	0.130405	0.090000	0.045474
20170613_CFE001	1	248	2	1.071	0.032	54664	0.0822	253	#N/A	#N/A	#N/A	167.248	167.590	34.9710	-122.3814	200-400	400	0.341995	347.723541	0.053627	0.090000	0.112204
20170613_CFE003	3	143	2	1.129	0.035	47842	0.0800	257.2	8.620	34.178	-0.02	166.627	166.876	34.9281	-122.2950	200-400	400	0.249008	221.582565	0.067179	0.090000	0.126795
20170613_CFE003	3	140	2	1.312	0.038	50388	0.1144	261.2	8.471	34.187	-0.02	165.473	165.721	34.8548	-122.0970	200-400	400	0.247986	232.416641	0.065594	0.090000	0.146113
20170613_CFE003	3	137	2	0.443	0.017	27164	0.0598	267.4	8.437	34.193	0.07	164.249	164.536	34.7610	-121.8794	200-400	400	0.287003	145.008392	0.083043	0.090000	0.054249
20170613_CFE003	3	145	2	0.137	0.011	9850	0.0571	501.6	6.384	34.277	-0.35	167.410	167.596	34.9518	-122.4319	200-400	400	0.185989	34.075047	0.171310	0.090000	0.026511
20170613_CFE001	1	244	2	0.292	0.012	17698	0.0554	505.7	6.365	34.276	0.00	165.626	165.875	34.8811	-122.1311	200-400	400	0.248993	81.964218	0.110456	0.090000	0.041604
20170613_CFE003	3	142	2	0.737	0.024	41258	0.0912	506	6.355	34.283	-0.05	166.235	166.484	34.9133	-122.2339	200-400	400	0.248993	191.076935	0.072343	0.090000	0.085102
20170613_CFE003	3	139	2	0.701	0.011	41309	0.0859	509.2	6.294	34.286	0.20	165.092	165.341	34.8308	-122.0158	200-400	400	0.249008	191.324646	0.072296	0.090000	0.080924
20170613_CFE001	1	247	2	0.380	0.019	20753	0.0555	514.2	6.274	34.293	0.05	166.850	167.099	34.9481	-122.3340	200-400	400	0.248993	96.112740	0.102002	0.090000	0.051692
20170613_CFE001	1	241	2	0.198	0.004	15482	0.0465	517.9	4.376	29.173	0.02	164.230	164.601	34.7607	-121.8885	200-400	400	0.371002	106.835670	0.096748	0.090000	0.026163
20170614_CFE002	2	62	2	0.838	0.081	11011	0.0102	97.6	9.498	33.964	-0.04	165.716	165.882	34.8606	-122.2621	400-1000	1000	0.166000	33.997562	0.171505	0.090000	0.162308
20170614_CFE002	2	61	2	0.850	0.103	11307	0.0128	113.1	9.352	34.024	0.12	165.406	165.572	34.8350	-122.1842	400-1000	1000	0.166000	34.911491	0.169245	0.090000	0.162934
20170614_CFE002	2	60	2	0.577	0.051	6511	0.0071	142.9	9.175	34.096	0.05	165.047	165.262	34.8017	-122.1022	400-1000	1000	0.214996	26.037003	0.195977	0.090000	0.124433
20170616_CFE004	4	71	2	0.363	0.037	8069	0.0091	144.1	9.091	34.031	0.08	167.044	167.209	34.7056	-122.3636	400-1000	1000	0.164993	24.762711	0.200956	0.090000	0.079929
20170616_CFE004	4	72	2	0.267	0.039	5602	0.0062	147	8.673	34.013	-0.01	167.364	167.529	34.7055	-122.3999	400-1000	1000	0.165009	17.193476	0.241167	0.090000	0.068729
20170614_CFE004	4	62	2	0.455	0.047	6573	0.0120	149.2	9.199	34.084	0.00	165.739	165.937	34.8663	-122.2743	400-1000	1000	0.197998	24.206800	0.203250	0.090000	0.101140
20170613_CFE001	1	243	2	0.801	0.102	6278	0.0102	150	9.065	34.090	0.00	165.223	165.471	34.8459	-122.0672	400-1000	1000	0.247986	28.957523	0.185831	0.090000	0.165389
20170613_CFE001	1	246	2	0.726	0.044	6030	0.0095	150.8	9.057	34.099	0.04	166.439	166.688	34.9275	-122.2670	400-1000	1000	0.249008	27.928238	0.189225	0.090000	0.152124
20170616_CFE002	2	72	2	2.428	0.129	27190	0.0190	151.3	8.582	34.008	-0.05	167.350	167.516	34.7054	-122.3950	400-1000	1000	0.166000	83.951843	0.109140	0.090000	0.343470
20170614_CFE004	4	61	2	0.251	0.042	3325	0.0054	152.8	9.124	34.113	0.06	165.430	165.596	34.8347	-122.1928	400-1000	1000	0.166000	10.266269	0.312100	0.090000	0.081529
20170616_CFE002	2	71	2	0.633	0.054	9559	0.0126	156.8	8.605	33.988	-0.04	167.034	167.200	34.7040	-122.3570	400-1000	1000	0.166000	29.514368	0.184070	0.090000	0.129698
20170613_CFE003	3	144	2	0.700	0.021	7240	0.0080	157.9	9.002	34.117	-0.05	166.984	167.233	34.9377	-122.3663	400-1000	1000	0.249008	33.532413	0.172690	0.090000	0.136315
20170616_CFE004	4	70	2	0.553	0.062	7627	0.0097	158.2	8.566	34.030	0.07	166.673	166.895	34.7067	-122.3233	400-1000	1000	0.222000	31.493408	0.178193	0.090000	0.110396
20170614_CFE004	4	60	2	0.438	0.086	4906	0.0100	160.7	9.112	34.116	0.12	165.060	165.277	34.7979	-122.1021	400-1000	1000	0.216995	19.801142	0.224727	0.090000	0.106031
20170613_CFE003	3	141	2	0.839	0.072	8199	0.0151	162.5	9.018	34.113	0.05	165.829	166.078	34.8846	-122.1689	400-1000	1000	0.249008	37.974068	0.162277	0.090000	0.155688
20170616_CFE002	2	70	2	0.510	0.039	5004	0.0065	164.4	8.402	34.013	0.19	166.659	166.881	34.7042	-122.3195	400-1000	1000	0.222000	20.662518	0.219993	0.090000	0.121222
20170613_CFE003	3	138	2	1.158	0.072	9708	0.0143	170.3	8.942	34.131	0.13	164.639	164.889	34.7984	-121.9447	400-1000	1000	0.250000	45.142200	0.148836	0.090000	0.201413
20170613_CFE001	1	245	2	0.553	0.021	5825	0.0115	247.7	8.565	34.116	0.03	166.022	166.271	34.9056	-122.1917	400-1000	1000	0.248993	26.977146	0.192532	0.090000	0.117529
20170613_CFE001	1	242	2	1.190	0.068	6881	0.0181	252.7	8.453	34.146	0.04	164.805	165.053	34.7990	-121.9838	400-1000	1000	0.248001	31.740805	0.177497	0.090000	0.236823
20170613_CFE001	1	248	2	1.398	0.042	18030	0.0271	253	#N/A	#N/A	#N/A	167.248	167.590	34.9710	-122.3814	400-1000	1000	0.341995	114.690758	0.093376	0.090000	0.181304
20170613_CFE003	3	143	2	1.110	0.034	11666	0.0195	257.2	8.620	34.178	-0.02	166.627	166.876	34.9281	-122.2950	400-1000	1000	0.249008	54.031647	0.136043	0.090000	0.181062
20170613_CFE003	3	140	2	0.791	0.023	7250	0.0165	261.2	8.471	34.187	-0.02	165.473	165.721	34.8548	-122.0970	400-1000	1000	0.247986	33.440914	0.172926	0.090000	0.154201
20170613_CFE003	3	137	2	1.319	0.051	9337	0.0206	267.4	8.437	34.193	0.07	164.249	164.536	34.7610	-121.8794	400-1000	1000	0.287003	49.843296	0.141643	0.090000	0.221351
20170613_CFE003	3	145	2	0.540	0.045	4504	0.0261	501.6	6.384	34.277	-0.35	167.410	167.596	34.9518	-122.4319	400-1000	1000	0.185989	15.581119	0.253338	0.090000	0.145179
20170613_CFE001	1	244	2	1.929	0.078	10630	0.0333	505.7	6.365	34.276	0.00	165.626	165.875	34.8811	-122.1311	400-1000	1000	0.248993	49.230396	0.142522	0.090000	0.325153
20170613_CFE003	3	142	2	2.652	0.087	20856	0.0461	506	6.355	34.283	-0.05	166.235	166.484	34.9133	-122.2339	400-1000	1000	0.248993	96.589767	0.101750	0.090000	0.360253
20170613_CFE003	3	139	2	3.642	0.055	26407	0.0549	509.2	6.294	34.286	0.20	165.092	165.341	34.8308	-122.0158	400-1000	1000	0.249008	122.305305	0.090423	0.090000	0.464642
20170613_CFE001	1	247	2	1.921	0.098	11466	0.0307	514.2	6.274	34.293	0.05	166.850	167.099	34.9481	-122.3340	400-1000	1000	0.248993	53.102139	0.137228	0.090000	0.315252
20170613_CFE001	1	241	2	1.577	0.034	9557	0.0287	517.9	4.376	29.173	0.02	164.230	164.601	34.7607	-121.8885	400-1000	1000	0.371002	65.949387	0.123139	0.090000	0.240529
20170614_CFE002	2	62	2	2.805	0.271	3397	0.0032	97.6	9.498	33.964	-0.04	165.716	165.882	34.8606	-122.2621	1000-10000	10000	0.166000	10.488577	0.308775	0.090000	0.902155
20170614_CFE002	2	61	2	4.108	0.500	3341	0.0038	113.1	9.352	34.024	0.12	165.406	165.572	34.8350	-122.1842	1000-10000	10000	0.166000	10.315671	0.311352	0.090000	1.331398
20170616_CFE004	4	71	2	1.837	0.189	1668	0.0019	144.1	9.091	34.031	0.08	167.044	167.209	34.7056	-122.3636	1000-10000	10000	0.164993	5.118875	0.441990	0.090000	0.828597
20170616_CFE004	4	72	2	3.441	0.500	3623	0.0040	147	8.673	34.013	-0.01	167.364	167.529	34.7055	-122.3999	1000-10000	10000	0.165009	11.119594	0.299886	0.090000	1.077377
20170614_CFE004	4	62	2	6.271	0.645	4623	0.0085	149.2	9.199	34.084	0.00	165.739	165.937	34.8663	-122.2743	1000-10000	10000	0.197998	17.025414	0.242355	0.090000	1.621220
20170613_CFE001	1	243	2	4.690	0.595	3898	0.0063	150	9.065	34.090	0.00	165.223	165.471	34.8459	-122.0672	1000-10000	10000	0.247986	17.979679	0.235835	0.090000	1.183871
20170613_CFE001	1	246	2	13.078	0.785	8684	0.0137	150.8	9.057	34.099	0.04	166.439	166.688	34.9275	-122.2670	1000-10000	10000	0.249008	40.220371	0.157680	0.090000	2.374404
20170616_CFE002	2	72	2	10.540	0.560	5411	0.0038	151.3	8.582	34.008	-0.05	167.350	167.516	34.7054	-122.3950	1000-10000	10000	0.166000	16.707003	0.244653	0.090000	2.747588
20170614_CFE004	4	61	2	2.185	0.362	1994	0.0033	152.8	9.124	34.113	0.06	165.430	165.596	34.8347	-122.1928	1000-10000	10000	0.166000	6.156674	0.403020	0.090000	0.902289
20170616_CFE002	2	71	2	0.452	0.039	954	0.0013	156.8	8.605	33.988	-0.04	167.034	167.200	34.7040	-122.3570	1000-10000	10000	0.166000	2.945570	0.582660	0.090000	0.266486
20170613_CFE003	3	144	2	29.538	0.886	12923	0.0143	157.9	9.002	34.117	-0.05	166.984	167.233	34.9377	-122.3663	1000-10000	10000	0.249008	59.853504	0.129257	0.090000	4.652340
20170616_CFE004	4	70	2	3.915	0.441	3120	0.0040	158.2	8.566	34.030	0.07	166.673	166.895	34.7067	-122.3233	1000-10000	10000	0.222000	12.883104	0.278606	0.090000	1.146242
20170614_CFE004	4	60	2	1.497	0.294	1251	0.0025	160.7	9.112	34.116	0.12	165.060	165.277	34.7979	-122.1021	1000-10000	10000	0.216995	5.049170	0.445031	0.090000	0.679698
20170613_CFE003	3	141	2	8.571	0.741	8021	0.0148	162.5	9.018	34.113	0.05	165.829	166.078	34.8846	-122.1689	1000-10000	10000	0.249008	37.149654	0.164068	0.090000	1.603907
20170616_CFE002	2	70	2	3.145	0.244	2457	0.0032	164.4	8.402	34.013	0.19	166.659	166.881	34.7042	-122.3195	1000-10000	10000	0.222000	10.145444	0.313953	0.090000	1.027152
20170613_CFE003	3	138	2	13.377	0.831	10579	0.0156	170.3	8.942	34.131	0.13	164.639	164.889	34.7984	-121.9447	1000-10000	10000	0.250000	49.192348	0.142578	0.090000	2.255462
20170613_CFE001	1	245	2	24.461	0.936	16141	0.0319	247.7	8.565	34.116	0.03	166.022	166.271	34.9056	-122.1917	1000-10000	10000	0.248993	74.753326	0.115660	0.090000	3.584787
20170613_CFE001	1	242	2	15.895	0.909	12228	0.0321	252.7	8.453	34.146	0.04	164.805	165.053	34.7990	-121.9838	1000-10000	10000	0.248001	56.405544	0.133149	0.090000	2.554533
20170613_CFE001	1	248	2	30.430	0.917	15377	0.0231	253	#N/A	#N/A	#N/A	167.248	167.590	34.9710	-122.3814	1000-10000	10000	0.341995	97.814743	0.101111	0.090000	4.119129
20170613_CFE003	3	143	2	30.149	0.925	17078	0.0286	257.2	8.620	34.178	-0.02	166.627	166.876	34.9281	-122.2950	1000-10000	10000	0.249008	79.097588	0.112439	0.090000	4.342139
20170613_CFE003	3	140	2	32.068	0.933	19237	0.0437	261.2	8.471	34.187	-0.02	165.473	165.721	34.8548	-122.0970	1000-10000	10000	0.247986	88.731430	0.106160	0.090000	4.463095
20170613_CFE003	3	137	2	24.097	0.924	18359	0.0404	267.4	8.437	34.193	0.07	164.249	164.536	34.7610	-121.8794	1000-10000	10000	0.287003	98.005043	0.101013	0.090000	3.260105
20170613_CFE003	3	145	2	11.326	0.938	6844	0.0397	501.6	6.384	34.277	-0.35	167.410	167.596	34.9518	-122.4319	1000-10000	10000	0.185989	23.676104	0.205516	0.090000	2.541087
20170613_CFE001	1	244	2	22.470	0.906	15160	0.0475	505.7	6.365	34.276	0.00	165.626	165.875	34.8811	-122.1311	1000-10000	10000	0.248993	70.210052	0.119344	0.090000	3.358719
20170613_CFE003	3	142	2	27.051	0.883	20618	0.0456	506	6.355	34.283	-0.05	166.235	166.484	34.9133	-122.2339	1000-10000	10000	0.248993	95.487526	0.102336	0.090000	3.686552
20170613_CFE003	3	139	2	62.061	0.932	35885	0.0746	509.2	6.294	34.286	0.20	165.092	165.341	34.8308	-122.0158	1000-10000	10000	0.249008	166.203140	0.077568	0.090000	7.373724
20170613_CFE001	1	247	2	17.176	0.875	10817	0.0289	514.2	6.274	34.293	0.05	166.850	167.099	34.9481	-122.3340	1000-10000	10000	0.248993	50.096443	0.141285	0.090000	2.877247
20170613_CFE001	1	241	2	44.670	0.959	17703	0.0531	517.9	4.376	29.173	0.02	164.230	164.601	34.7607	-121.8885	1000-10000	10000	0.371002	122.161980	0.090476	0.090000	5.700618
20170621_CFE002	2	90	3	0.063	0.015	196770	0.6109	126.7	9.434	33.678	0.08	171.190	171.367	34.1046	-122.9711	30-100	100	0.177002	647.813538	0.039289	0.090000	0.006187
20170619_CFE002	2	81	3	0.144	0.036	472284	0.5965	129.4	9.360	33.702	-0.05	170.472	170.637	34.1949	-123.1127	30-100	100	0.164993	1449.378174	0.026267	0.090000	0.013501
20170619_CFE002	2	80	3	0.079	0.014	240772	0.4842	141.8	9.143	33.774	0.12	170.192	170.366	34.2140	-123.1368	30-100	100	0.173996	779.216614	0.035824	0.090000	0.007653
20170619_CFE002	2	82	3	0.128	0.042	457732	0.6542	143.4	9.047	33.802	0.16	170.740	170.878	34.1801	-123.0870	30-100	100	0.138000	1174.906494	0.029174	0.090000	0.012110
20170621_CFE004	4	92	3	0.043	0.007	265888	0.8272	148.8	9.011	33.818	0.06	171.860	171.901	34.0756	-122.8777	30-100	100	0.041000	202.766190	0.070227	0.090000	0.004909
20170621_CFE002	2	92	3	0.033	0.030	151367	0.6862	154.8	8.905	33.851	0.00	171.737	171.909	34.0816	-122.9023	30-100	100	0.171997	484.244873	0.045443	0.090000	0.003327
20170621_CFE002	2	91	3	0.055	0.021	204276	0.6156	159.7	8.899	33.851	0.10	171.468	171.634	34.0899	-122.9353	30-100	100	0.166000	630.722595	0.039818	0.090000	0.005413
20170621_CFE004	4	91	3	0.030	0.031	141706	0.7258	160.9	8.915	33.850	0.02	171.553	171.719	34.0838	-122.9131	30-100	100	0.166000	437.531433	0.047807	0.090000	0.003057
20170621_CFE001	1	275	3	0.030	0.006	152589	0.7449	170.7	8.716	33.879	-0.02	172.043	172.292	34.0907	-122.8968	30-100	100	0.249008	706.723450	0.037616	0.090000	0.002926
20170621_CFE004	4	90	3	0.014	0.006	76559	0.7422	173.3	8.490	33.907	0.00	171.205	171.412	34.0990	-122.9563	30-100	100	0.207001	294.768890	0.058245	0.090000	0.001501
20170621_CFE001	1	274	3	0.011	0.004	59585	0.7116	253.2	7.468	33.999	0.00	171.688	171.936	34.1002	-122.9437	30-100	100	0.248001	274.854797	0.060318	0.090000	0.001192
20170619_CFE001	1	261	3	0.018	0.003	87875	0.7240	259.7	7.317	33.990	-0.04	170.513	170.763	34.2139	-123.0699	30-100	100	0.250000	408.618744	0.049470	0.090000	0.001849
20170619_CFE001	1	260	3	0.011	0.003	58604	0.7819	513.5	5.367	34.191	0.05	170.123	170.372	34.2282	-123.0877	30-100	100	0.248993	271.410919	0.060700	0.090000	0.001194
20170621_CFE001	1	273	3	0.008	0.010	45714	0.7960	517.2	5.444	34.202	0.02	171.222	171.541	34.1081	-122.9746	30-100	100	0.319000	271.239471	0.060719	0.090000	0.000869
20170621_CFE002	2	90	3	0.173	0.042	102335	0.3177	126.7	9.434	33.678	0.08	171.190	171.367	34.1046	-122.9711	100-200	200	0.177002	336.911102	0.054481	0.090000	0.018201
20170619_CFE002	2	81	3	0.336	0.084	280514	0.3543	129.4	9.360	33.702	-0.05	170.472	170.637	34.1949	-123.1127	100-200	200	0.164993	860.860962	0.034083	0.090000	0.032336
20170619_CFE002	2	80	3	0.364	0.063	224365	0.4512	141.8	9.143	33.774	0.12	170.192	170.366	34.2140	-123.1368	100-200	200	0.173996	726.118225	0.037110	0.090000	0.035436
20170619_CFE002	2	82	3	0.277	0.091	201221	0.2876	143.4	9.047	33.802	0.16	170.740	170.878	34.1801	-123.0870	100-200	200	0.138000	516.494080	0.044001	0.090000	0.027750
20170621_CFE004	4	92	3	0.073	0.012	40451	0.1259	148.8	9.011	33.818	0.06	171.860	171.901	34.0756	-122.8777	100-200	200	0.041000	30.847935	0.180047	0.090000	0.014694
20170621_CFE002	2	92	3	0.108	0.098	43073	0.1953	154.8	8.905	33.851	0.00	171.737	171.909	34.0816	-122.9023	100-200	200	0.171997	137.796738	0.085188	0.090000	0.013384
20170621_CFE002	2	91	3	0.181	0.068	105687	0.3185	159.7	8.899	33.851	0.10	171.468	171.634	34.0899	-122.9353	100-200	200	0.166000	326.319153	0.055358	0.090000	0.019125
20170621_CFE004	4	91	3	0.072	0.074	41440	0.2122	160.9	8.915	33.850	0.02	171.553	171.719	34.0838	-122.9131	100-200	200	0.166000	127.950134	0.088406	0.090000	0.009083
20170621_CFE001	1	275	3	0.081	0.017	36030	0.1759	170.7	8.716	33.879	-0.02	172.043	172.292	34.0907	-122.8968	100-200	200	0.249008	166.874695	0.077411	0.090000	0.009616
20170621_CFE004	4	90	3	0.041	0.016	20128	0.1951	173.3	8.490	33.907	0.00	171.205	171.412	34.0990	-122.9563	100-200	200	0.207001	77.497200	0.113594	0.090000	0.005942
20170621_CFE001	1	274	3	0.045	0.017	15441	0.1844	253.2	7.468	33.999	0.00	171.688	171.936	34.1002	-122.9437	100-200	200	0.248001	71.226532	0.118489	0.090000	0.006696
20170619_CFE001	1	261	3	0.064	0.012	20587	0.1696	259.7	7.317	33.990	-0.04	170.513	170.763	34.2139	-123.0699	100-200	200	0.250000	95.729553	0.102206	0.090000	0.008716
20170619_CFE001	1	260	3	0.026	0.007	8279	0.1105	513.5	5.367	34.191	0.05	170.123	170.372	34.2282	-123.0877	100-200	200	0.248993	38.342285	0.161496	0.090000	0.004807
20170621_CFE001	1	273	3	0.023	0.030	6372	0.1110	517.2	5.444	34.202	0.02	171.222	171.541	34.1081	-122.9746	100-200	200	0.319000	37.807625	0.162634	0.090000	0.004275
20170621_CFE002	2	90	3	0.332	0.081	17188	0.0534	126.7	9.434	33.678	0.08	171.190	171.367	34.1046	-122.9711	200-400	400	0.177002	56.586971	0.132936	0.090000	0.053298
20170619_CFE002	2	81	3	0.569	0.143	32071	0.0405	129.4	9.360	33.702	-0.05	170.472	170.637	34.1949	-123.1127	200-400	400	0.164993	98.421730	0.100799	0.090000	0.076890
20170619_CFE002	2	80	3	0.607	0.104	28127	0.0566	141.8	9.143	33.774	0.12	170.192	170.366	34.2140	-123.1368	200-400	400	0.173996	91.028130	0.104812	0.090000	0.083857
20170619_CFE002	2	82	3	0.874	0.288	36419	0.0521	143.4	9.047	33.802	0.16	170.740	170.878	34.1801	-123.0870	200-400	400	0.138000	93.480286	0.103428	0.090000	0.119828
20170621_CFE004	4	92	3	0.134	0.022	9920	0.0309	148.8	9.011	33.818	0.06	171.860	171.901	34.0756	-122.8777	200-400	400	0.041000	7.564992	0.363576	0.090000	0.050190
20170621_CFE002	2	92	3	0.663	0.603	22764	0.1032	154.8	8.905	33.851	0.00	171.737	171.909	34.0816	-122.9023	200-400	400	0.171997	72.825317	0.117181	0.090000	0.097961
20170621_CFE002	2	91	3	0.313	0.118	18678	0.0563	159.7	8.899	33.851	0.10	171.468	171.634	34.0899	-122.9353	200-400	400	0.166000	57.670189	0.131681	0.090000	0.049923
20170621_CFE004	4	91	3	0.188	0.193	9591	0.0491	160.9	8.915	33.850	0.02	171.553	171.719	34.0838	-122.9131	200-400	400	0.166000	29.613171	0.183763	0.090000	0.038468
20170621_CFE001	1	275	3	0.281	0.058	12677	0.0619	170.7	8.716	33.879	-0.02	172.043	172.292	34.0907	-122.8968	200-400	400	0.249008	58.714142	0.130505	0.090000	0.044547
20170621_CFE004	4	90	3	0.133	0.054	5209	0.0505	173.3	8.490	33.907	0.00	171.205	171.412	34.0990	-122.9563	200-400	400	0.207001	20.055788	0.223296	0.090000	0.032020
20170621_CFE001	1	274	3	0.169	0.062	4903	0.0586	253.2	7.468	33.999	0.00	171.688	171.936	34.1002	-122.9437	200-400	400	0.248001	22.616650	0.210274	0.090000	0.038655
20170619_CFE001	1	261	3	0.155	0.030	6151	0.0507	259.7	7.317	33.990	-0.04	170.513	170.763	34.2139	-123.0699	200-400	400	0.250000	28.602150	0.186982	0.090000	0.032165
20170619_CFE001	1	260	3	0.113	0.032	4232	0.0565	513.5	5.367	34.191	0.05	170.123	170.372	34.2282	-123.0877	200-400	400	0.248993	19.599535	0.225880	0.090000	0.027476
20170621_CFE001	1	273	3	0.092	0.121	4033	0.0702	517.2	5.444	34.202	0.02	171.222	171.541	34.1081	-122.9746	200-400	400	0.319000	23.929401	0.204425	0.090000	0.020549
20170621_CFE002	2	90	3	0.266	0.065	4293	0.0133	126.7	9.434	33.678	0.08	171.190	171.367	34.1046	-122.9711	400-1000	1000	0.177002	14.133574	0.265995	0.090000	0.074695
20170619_CFE002	2	81	3	0.413	0.104	4338	0.0055	129.4	9.360	33.702	-0.05	170.472	170.637	34.1949	-123.1127	400-1000	1000	0.164993	13.312757	0.274073	0.090000	0.119139
20170619_CFE002	2	80	3	0.145	0.025	2369	0.0048	141.8	9.143	33.774	0.12	170.192	170.366	34.2140	-123.1368	400-1000	1000	0.173996	7.666855	0.361153	0.090000	0.053969
20170619_CFE002	2	82	3	0.185	0.061	3154	0.0045	143.4	9.047	33.802	0.16	170.740	170.878	34.1801	-123.0870	400-1000	1000	0.138000	8.095687	0.351458	0.090000	0.067118
20170621_CFE004	4	92	3	0.154	0.025	2623	0.0082	148.8	9.011	33.818	0.06	171.860	171.901	34.0756	-122.8777	400-1000	1000	0.041000	2.000300	0.707054	0.090000	0.109765
20170621_CFE002	2	92	3	0.295	0.269	3374	0.0153	154.8	8.905	33.851	0.00	171.737	171.909	34.0816	-122.9023	400-1000	1000	0.171997	10.793913	0.304376	0.090000	0.093634
20170621_CFE002	2	91	3	0.071	0.027	2206	0.0067	159.7	8.899	33.851	0.10	171.468	171.634	34.0899	-122.9353	400-1000	1000	0.166000	6.811245	0.383166	0.090000	0.027945
20170621_CFE004	4	91	3	0.263	0.271	1705	0.0087	160.9	8.915	33.850	0.02	171.553	171.719	34.0838	-122.9131	400-1000	1000	0.166000	5.264358	0.435840	0.090000	0.117044
20170621_CFE001	1	275	3	0.068	0.014	1264	0.0062	170.7	8.716	33.879	-0.02	172.043	172.292	34.0907	-122.8968	400-1000	1000	0.249008	5.854278	0.413298	0.090000	0.028763
20170621_CFE004	4	90	3	0.045	0.018	573	0.0056	173.3	8.490	33.907	0.00	171.205	171.412	34.0990	-122.9563	400-1000	1000	0.207001	2.206175	0.673256	0.090000	0.030566
20170621_CFE001	1	274	3	0.424	0.156	2547	0.0304	253.2	7.468	33.999	0.00	171.688	171.936	34.1002	-122.9437	400-1000	1000	0.248001	11.748848	0.291744	0.090000	0.129452
20170619_CFE001	1	261	3	0.515	0.100	3803	0.0313	259.7	7.317	33.990	-0.04	170.513	170.763	34.2139	-123.0699	400-1000	1000	0.250000	17.683950	0.237799	0.090000	0.130944
20170619_CFE001	1	260	3	0.258	0.072	2078	0.0277	513.5	5.367	34.191	0.05	170.123	170.372	34.2282	-123.0877	400-1000	1000	0.248993	9.623779	0.322350	0.090000	0.086347
20170621_CFE001	1	273	3	0.095	0.125	821	0.0143	517.2	5.444	34.202	0.02	171.222	171.541	34.1081	-122.9746	400-1000	1000	0.319000	4.871322	0.453082	0.090000	0.043884
20170621_CFE002	2	90	3	3.280	0.797	1497	0.0047	126.7	9.434	33.678	0.08	171.190	171.367	34.1046	-122.9711	1000-10000	10000	0.177002	4.928479	0.450447	0.090000	1.506668
20170619_CFE002	2	81	3	2.518	0.633	2593	0.0033	129.4	9.360	33.702	-0.05	170.472	170.637	34.1949	-123.1127	1000-10000	10000	0.164993	7.957579	0.354495	0.090000	0.920937
20170619_CFE002	2	80	3	4.630	0.795	1681	0.0034	141.8	9.143	33.774	0.12	170.192	170.366	34.2140	-123.1368	1000-10000	10000	0.173996	5.440263	0.428736	0.090000	2.028313
20170619_CFE002	2	82	3	1.567	0.517	1122	0.0016	143.4	9.047	33.802	0.16	170.740	170.878	34.1801	-123.0870	1000-10000	10000	0.138000	2.879950	0.589261	0.090000	0.934080
20170621_CFE004	4	92	3	5.653	0.933	2551	0.0079	148.8	9.011	33.818	0.06	171.860	171.901	34.0756	-122.8777	1000-10000	10000	0.041000	1.945393	0.716962	0.090000	4.084794
20170621_CFE002	2	91	3	2.030	0.766	993	0.0030	159.7	8.899	33.851	0.10	171.468	171.634	34.0899	-122.9353	1000-10000	10000	0.166000	3.065987	0.571104	0.090000	1.173649
20170621_CFE004	4	91	3	0.419	0.431	807	0.0041	160.9	8.915	33.850	0.02	171.553	171.719	34.0838	-122.9131	1000-10000	10000	0.166000	2.491693	0.633509	0.090000	0.268106
20170621_CFE001	1	275	3	4.412	0.906	2293	0.0112	170.7	8.716	33.879	-0.02	172.043	172.292	34.0907	-122.8968	1000-10000	10000	0.249008	10.620141	0.306856	0.090000	1.410879
20170621_CFE004	4	90	3	2.232	0.906	676	0.0066	173.3	8.490	33.907	0.00	171.205	171.412	34.0990	-122.9563	1000-10000	10000	0.207001	2.602748	0.619846	0.090000	1.398004
20170621_CFE001	1	274	3	2.071	0.761	1264	0.0151	253.2	7.468	33.999	0.00	171.688	171.936	34.1002	-122.9437	1000-10000	10000	0.248001	5.830603	0.414136	0.090000	0.877695
20170619_CFE001	1	261	3	4.388	0.854	2959	0.0244	259.7	7.317	33.990	-0.04	170.513	170.763	34.2139	-123.0699	1000-10000	10000	0.250000	13.759350	0.269588	0.090000	1.247132
20170619_CFE001	1	260	3	3.158	0.886	1762	0.0235	513.5	5.367	34.191	0.05	170.123	170.372	34.2282	-123.0877	1000-10000	10000	0.248993	8.160297	0.350064	0.090000	1.141454
20170621_CFE001	1	273	3	0.541	0.713	487	0.0085	517.2	5.444	34.202	0.02	171.222	171.541	34.1081	-122.9746	1000-10000	10000	0.319000	2.889566	0.588279	0.090000	0.321962
20170625_CFE004	4	111	4	0.147	0.009	745685	0.7890	102	9.319	33.933	-0.05	175.599	175.876	34.4444	-123.0011	30	100	0.277008	3842.029053	0.016133	0.090000	0.013441
20170623_CFE004	4	101	4	0.193	0.003	1129464	0.7537	117.5	8.947	33.982	-0.12	174.489	174.655	34.4177	-123.0868	30-100	100	0.166000	3487.333008	0.016934	0.090000	0.017675
20170625_CFE004	4	113	4	0.089	0.017	465870	0.7930	119.7	9.263	34.013	0.00	176.384	176.495	34.4806	-122.9880	30-100	100	0.110992	961.765869	0.032245	0.090000	0.008509
20170623_CFE002	2	102	4	0.102	0.008	592485	0.8340	124.3	#N/A	#N/A	#N/A	174.743	174.901	34.4227	-123.0461	30-100	100	0.158005	1741.250000	0.023965	0.090000	0.009500
20170623_CFE004	4	102	4	0.150	0.003	936073	0.7258	133.4	9.024	34.050	0.23	174.767	174.898	34.4255	-123.0682	30-100	100	0.130997	2280.783203	0.020939	0.090000	0.013861
20170623_CFE002	2	101	4	0.104	0.003	546949	0.7619	139.2	9.021	34.054	0.00	174.479	174.645	34.4175	-123.0683	30-100	100	0.166000	1688.759644	0.024334	0.090000	0.009696
20170623_CFE001	1	291	4	0.133	0.003	755385	0.7652	141.2	8.837	34.052	-0.06	174.978	175.226	34.4290	-123.0783	30-100	100	0.248001	3484.453857	0.016941	0.090000	0.012180
20170623_CFE001	1	294	4	0.158	0.005	783001	0.7495	151	8.611	34.070	-0.03	176.084	176.333	34.4457	-123.0862	30-100	100	0.248993	3626.288818	0.016606	0.090000	0.014460
20170625_CFE002	2	113	4	0.070	0.007	354485	0.7764	153.3	8.774	34.072	0.03	176.350	176.514	34.4528	-123.0120	30-100	100	0.164001	1081.327637	0.030410	0.090000	0.006650
20170625_CFE002	2	112	4	0.076	0.004	502259	0.7872	155.5	8.779	34.069	0.01	175.966	176.241	34.4463	-123.0076	30-100	100	0.274994	2568.998535	0.019730	0.090000	0.007002
20170625_CFE004	4	112	4	0.058	0.011	367275	0.8174	159.3	8.773	34.069	-0.03	175.989	176.266	34.4658	-122.9915	30-100	100	0.277008	1892.328857	0.022988	0.090000	0.005388
20170625_CFE002	2	110	4	0.078	0.004	467353	0.7609	161.6	8.660	34.081	-0.01	175.176	175.468	34.4286	-123.0127	30-100	100	0.292007	2538.348389	0.019848	0.090000	0.007189
20170625_CFE004	4	110	4	0.056	0.004	337129	0.7360	164.3	8.650	34.079	0.08	175.187	175.486	34.4277	-123.0092	30-100	100	0.298996	1874.884277	0.023095	0.090000	0.005203
20170623_CFE004	4	100	4	0.077	0.003	474934	0.6943	190	8.453	34.115	-0.02	174.180	174.367	34.4089	-123.0996	30-100	100	0.187012	1652.021484	0.024603	0.090000	0.007184
20170623_CFE001	1	290	4	0.074	0.004	458415	0.6893	259.1	7.608	34.129	0.18	174.618	174.867	34.4146	-123.0832	30-100	100	0.249008	2123.171387	0.021702	0.090000	0.006851
20170623_CFE001	1	293	4	0.138	0.002	844258	0.6894	259.5	7.648	34.166	0.06	175.724	175.973	34.4374	-123.0779	30-100	100	0.249008	3910.222168	0.015992	0.090000	0.012615
20170623_CFE001	1	292	4	0.073	0.003	461714	0.6867	526.6	5.376	34.238	-0.01	175.340	175.589	34.4356	-123.0798	30-100	100	0.249008	2138.450928	0.021625	0.090000	0.006757
20170623_CFE001	1	295	4	0.008	0.002	48770	0.7761	526.6	5.376	34.238	0.00	176.448	176.682	34.4482	-123.0970	30-100	100	0.234009	212.274719	0.068636	0.090000	0.000905
20170623_CFE001	1	289	4	0.030	0.002	165871	0.7283	526.8	5.257	34.224	0.13	174.205	174.483	34.4056	-123.0927	30-100	100	0.278000	857.685730	0.034146	0.090000	0.002888
20170625_CFE004	4	111	4	0.237	0.015	137999	0.1460	102	9.319	33.933	-0.05	175.599	175.876	34.4444	-123.0011	100	200	0.277008	711.018982	0.037502	0.090000	0.023108
20170623_CFE004	4	101	4	0.324	0.005	224075	0.1495	117.5	8.947	33.982	-0.12	174.489	174.655	34.4177	-123.0868	100-200	200	0.166000	691.853943	0.038018	0.090000	0.031655
20170625_CFE004	4	113	4	0.137	0.025	84267	0.1435	119.7	9.263	34.013	0.00	176.384	176.495	34.4806	-122.9880	100-200	200	0.110992	173.965103	0.075817	0.090000	0.016122
20170623_CFE002	2	102	4	0.134	0.010	78818	0.1110	124.3	#N/A	#N/A	#N/A	174.743	174.901	34.4227	-123.0461	100-200	200	0.158005	231.637665	0.065705	0.090000	0.014932
20170623_CFE004	4	102	4	0.345	0.006	208160	0.1614	133.4	9.024	34.050	0.23	174.767	174.898	34.4255	-123.0682	100-200	200	0.130997	507.191040	0.044403	0.090000	0.034623
20170623_CFE002	2	101	4	0.279	0.007	104209	0.1452	139.2	9.021	34.054	0.00	174.479	174.645	34.4175	-123.0683	100-200	200	0.166000	321.755707	0.055749	0.090000	0.029537
20170623_CFE001	1	291	4	0.243	0.005	139904	0.1417	141.2	8.837	34.052	-0.06	174.978	175.226	34.4290	-123.0783	100-200	200	0.248001	645.351807	0.039364	0.090000	0.023870
20170623_CFE001	1	294	4	0.290	0.009	173253	0.1658	151	8.611	34.070	-0.03	176.084	176.333	34.4457	-123.0862	100-200	200	0.248993	802.381409	0.035303	0.090000	0.028036
20170625_CFE002	2	113	4	0.135	0.014	77850	0.1705	153.3	8.774	34.072	0.03	176.350	176.514	34.4528	-123.0120	100-200	200	0.164001	237.475098	0.064892	0.090000	0.014979
20170625_CFE002	2	112	4	0.149	0.007	83284	0.1305	155.5	8.779	34.069	0.01	175.966	176.241	34.4463	-123.0076	100-200	200	0.274994	425.988342	0.048451	0.090000	0.015230
20170625_CFE004	4	112	4	0.103	0.020	57866	0.1288	159.3	8.773	34.069	-0.03	175.989	176.266	34.4658	-122.9915	100-200	200	0.277008	298.145813	0.057914	0.090000	0.011023
20170625_CFE002	2	110	4	0.181	0.008	100832	0.1642	161.6	8.660	34.081	-0.01	175.176	175.468	34.4286	-123.0127	100-200	200	0.292007	547.651917	0.042731	0.090000	0.018033
20170625_CFE004	4	110	4	0.134	0.011	77242	0.1686	164.3	8.650	34.079	0.08	175.187	175.486	34.4277	-123.0092	100-200	200	0.298996	429.567902	0.048249	0.090000	0.013684
20170623_CFE004	4	100	4	0.201	0.007	125048	0.1828	190	8.453	34.115	-0.02	174.180	174.367	34.4089	-123.0996	100-200	200	0.187012	434.969879	0.047948	0.090000	0.020497
20170623_CFE001	1	290	4	0.240	0.013	128901	0.1938	259.1	7.608	34.129	0.18	174.618	174.867	34.4146	-123.0832	100-200	200	0.249008	597.011292	0.040927	0.090000	0.023728
20170623_CFE001	1	293	4	0.389	0.005	232571	0.1899	259.5	7.648	34.166	0.06	175.724	175.973	34.4374	-123.0779	100-200	200	0.249008	1077.163940	0.030469	0.090000	0.036962
20170623_CFE001	1	292	4	0.207	0.007	122546	0.1823	526.6	5.376	34.238	-0.01	175.340	175.589	34.4356	-123.0798	100-200	200	0.249008	567.577759	0.041975	0.090000	0.020557
20170623_CFE001	1	295	4	0.016	0.003	7897	0.1257	526.6	5.376	34.238	0.00	176.448	176.682	34.4482	-123.0970	100-200	200	0.234009	34.372223	0.170567	0.090000	0.003086
20170623_CFE001	1	289	4	0.062	0.004	36786	0.1615	526.8	5.257	34.224	0.13	174.205	174.483	34.4056	-123.0927	100-200	200	0.278000	190.213043	0.072507	0.090000	0.007166
20170625_CFE004	4	111	4	0.540	0.033	40439	0.0428	102	9.319	33.933	-0.05	175.599	175.876	34.4444	-123.0011	200	400	0.277008	208.355835	0.069278	0.090000	0.061331
20170623_CFE004	4	101	4	0.823	0.011	74857	0.0500	117.5	8.947	33.982	-0.12	174.489	174.655	34.4177	-123.0868	200-400	400	0.166000	231.128464	0.065777	0.090000	0.091744
20170625_CFE004	4	113	4	0.196	0.036	22365	0.0381	119.7	9.263	34.013	0.00	176.384	176.495	34.4806	-122.9880	200-400	400	0.110992	46.171452	0.147168	0.090000	0.033811
20170623_CFE002	2	102	4	0.373	0.029	26931	0.0379	124.3	#N/A	#N/A	#N/A	174.743	174.901	34.4227	-123.0461	200-400	400	0.158005	79.147324	0.112404	0.090000	0.053710
20170623_CFE004	4	102	4	0.878	0.015	74249	0.0576	133.4	9.024	34.050	0.23	174.767	174.898	34.4255	-123.0682	200-400	400	0.130997	180.910980	0.074348	0.090000	0.102495
20170623_CFE002	2	101	4	0.738	0.018	46782	0.0652	139.2	9.021	34.054	0.00	174.479	174.645	34.4175	-123.0683	200-400	400	0.166000	144.444092	0.083205	0.090000	0.090456
20170623_CFE001	1	291	4	0.628	0.012	53170	0.0539	141.2	8.837	34.052	-0.06	174.978	175.226	34.4290	-123.0783	200-400	400	0.248001	245.263565	0.063853	0.090000	0.069300
20170623_CFE001	1	294	4	0.622	0.020	51363	0.0492	151	8.611	34.070	-0.03	176.084	176.333	34.4457	-123.0862	200-400	400	0.248993	237.875916	0.064837	0.090000	0.068994
20170625_CFE002	2	113	4	0.255	0.027	16484	0.0361	153.3	8.774	34.072	0.03	176.350	176.514	34.4528	-123.0120	200-400	400	0.164001	50.283104	0.141023	0.090000	0.042660
20170625_CFE002	2	112	4	0.375	0.018	37188	0.0583	155.5	8.779	34.069	0.01	175.966	176.241	34.4463	-123.0076	200-400	400	0.274994	190.212463	0.072507	0.090000	0.043340
20170625_CFE004	4	112	4	0.208	0.040	15950	0.0355	159.3	8.773	34.069	-0.03	175.989	176.266	34.4658	-122.9915	200-400	400	0.277008	82.179962	0.110311	0.090000	0.029612
20170625_CFE002	2	110	4	0.533	0.025	31091	0.0506	161.6	8.660	34.081	-0.01	175.176	175.468	34.4286	-123.0127	200-400	400	0.292007	168.865494	0.076954	0.090000	0.063115
20170625_CFE004	4	110	4	0.276	0.022	27492	0.0600	164.3	8.650	34.079	0.08	175.187	175.486	34.4277	-123.0092	200-400	400	0.298996	152.891968	0.080874	0.090000	0.033396
20170623_CFE004	4	100	4	0.522	0.017	54452	0.0796	190	8.453	34.115	-0.02	174.180	174.367	34.4089	-123.0996	200-400	400	0.187012	189.407104	0.072661	0.090000	0.060380
20170623_CFE001	1	290	4	0.482	0.025	47176	0.0709	259.1	7.608	34.129	0.18	174.618	174.867	34.4146	-123.0832	200-400	400	0.249008	218.497940	0.067651	0.090000	0.054269
20170623_CFE001	1	293	4	0.918	0.012	87802	0.0717	259.5	7.648	34.166	0.06	175.724	175.973	34.4374	-123.0779	200-400	400	0.249008	406.659241	0.049589	0.090000	0.094331
20170623_CFE001	1	292	4	0.524	0.018	52981	0.0788	526.6	5.376	34.238	-0.01	175.340	175.589	34.4356	-123.0798	200-400	400	0.249008	245.384079	0.063838	0.090000	0.057819
20170623_CFE001	1	295	4	0.042	0.009	2583	0.0411	526.6	5.376	34.238	0.00	176.448	176.682	34.4482	-123.0970	200-400	400	0.234009	11.242682	0.298239	0.090000	0.013084
20170623_CFE001	1	289	4	0.172	0.011	12043	0.0529	526.8	5.257	34.224	0.13	174.205	174.483	34.4056	-123.0927	200-400	400	0.278000	62.271942	0.126723	0.090000	0.026734
20170625_CFE004	4	111	4	0.867	0.053	10562	0.0112	102	9.319	33.933	-0.05	175.599	175.876	34.4444	-123.0011	400	1000	0.277008	54.419109	0.135558	0.090000	0.141073
20170623_CFE004	4	101	4	4.350	0.061	42923	0.0286	117.5	8.947	33.982	-0.12	174.489	174.655	34.4177	-123.0868	400-1000	1000	0.166000	132.529053	0.086865	0.090000	0.544107
20170625_CFE004	4	113	4	0.789	0.146	9263	0.0158	119.7	9.263	34.013	0.00	176.384	176.495	34.4806	-122.9880	400-1000	1000	0.110992	19.123011	0.228677	0.090000	0.193897
20170623_CFE002	2	102	4	0.457	0.036	5887	0.0083	124.3	#N/A	#N/A	#N/A	174.743	174.901	34.4227	-123.0461	400-1000	1000	0.158005	17.301262	0.240415	0.090000	0.117316
20170623_CFE004	4	102	4	4.713	0.082	44264	0.0343	133.4	9.024	34.050	0.23	174.767	174.898	34.4255	-123.0682	400-1000	1000	0.130997	107.851189	0.096291	0.090000	0.621186
20170623_CFE002	2	101	4	0.919	0.022	8591	0.0120	139.2	9.021	34.054	0.00	174.479	174.645	34.4175	-123.0683	400-1000	1000	0.166000	26.525572	0.194164	0.090000	0.196674
20170623_CFE001	1	291	4	2.362	0.045	23484	0.0238	141.2	8.837	34.052	-0.06	174.978	175.226	34.4290	-123.0783	400-1000	1000	0.248001	108.327423	0.096080	0.090000	0.310954
20170623_CFE001	1	294	4	2.432	0.077	24980	0.0239	151	8.611	34.070	-0.03	176.084	176.333	34.4457	-123.0862	400-1000	1000	0.248993	115.689125	0.092972	0.090000	0.314695
20170625_CFE002	2	113	4	0.629	0.066	4289	0.0094	153.3	8.774	34.072	0.03	176.350	176.514	34.4528	-123.0120	400-1000	1000	0.164001	13.083246	0.276466	0.090000	0.182879
20170625_CFE002	2	112	4	0.697	0.034	7952	0.0125	155.5	8.779	34.069	0.01	175.966	176.241	34.4463	-123.0076	400-1000	1000	0.274994	40.673592	0.156799	0.090000	0.126012
20170625_CFE004	4	112	4	0.726	0.139	5509	0.0123	159.3	8.773	34.069	-0.03	175.989	176.266	34.4658	-122.9915	400-1000	1000	0.277008	28.384291	0.187699	0.090000	0.151125
20170625_CFE002	2	110	4	1.101	0.051	8912	0.0145	161.6	8.660	34.081	-0.01	175.176	175.468	34.4286	-123.0127	400-1000	1000	0.292007	48.404015	0.143734	0.090000	0.186714
20170625_CFE004	4	110	4	0.763	0.060	8534	0.0186	164.3	8.650	34.079	0.08	175.187	175.486	34.4277	-123.0092	400-1000	1000	0.298996	47.460354	0.145156	0.090000	0.130315
20170623_CFE004	4	100	4	1.600	0.053	21019	0.0307	190	8.453	34.115	-0.02	174.180	174.367	34.4089	-123.0996	400-1000	1000	0.187012	73.112976	0.116951	0.090000	0.236115
20170623_CFE001	1	290	4	1.681	0.088	22051	0.0332	259.1	7.608	34.129	0.18	174.618	174.867	34.4146	-123.0832	400-1000	1000	0.249008	102.130287	0.098952	0.090000	0.224849
20170623_CFE001	1	293	4	2.608	0.035	32721	0.0267	259.5	7.648	34.166	0.06	175.724	175.973	34.4374	-123.0779	400-1000	1000	0.249008	151.548904	0.081231	0.090000	0.316187
20170623_CFE001	1	292	4	1.524	0.053	21928	0.0326	526.6	5.376	34.238	-0.01	175.340	175.589	34.4356	-123.0798	400-1000	1000	0.249008	101.560608	0.099229	0.090000	0.204161
20170623_CFE001	1	295	4	0.128	0.027	1150	0.0183	526.6	5.376	34.238	0.00	176.448	176.682	34.4482	-123.0970	400-1000	1000	0.234009	5.005453	0.446970	0.090000	0.058360
20170623_CFE001	1	289	4	1.015	0.064	6835	0.0300	526.8	5.257	34.224	0.13	174.205	174.483	34.4056	-123.0927	400-1000	1000	0.278000	35.342419	0.168210	0.090000	0.193635
20170625_CFE004	4	111	4	14.470	0.890	10412	0.0110	102	9.319	33.933	-0.05	175.599	175.876	34.4444	-123.0011	1000	10000	0.277008	53.646255	0.136531	0.090000	2.366220
20170623_CFE004	4	101	4	66.168	0.921	27317	0.0182	117.5	8.947	33.982	-0.12	174.489	174.655	34.4177	-123.0868	1000-10000	10000	0.166000	84.343971	0.108886	0.090000	9.347307
20170625_CFE004	4	113	4	4.176	0.775	5682	0.0097	119.7	9.263	34.013	0.00	176.384	176.495	34.4806	-122.9880	1000-10000	10000	0.110992	11.730212	0.291976	0.090000	1.275903
20170623_CFE002	2	102	4	11.792	0.917	6291	0.0089	124.3	#N/A	#N/A	#N/A	174.743	174.901	34.4227	-123.0461	1000-10000	10000	0.158005	18.488577	0.232567	0.090000	2.940619
20170623_CFE004	4	102	4	51.239	0.894	27002	0.0209	133.4	9.024	34.050	0.23	174.767	174.898	34.4255	-123.0682	1000-10000	10000	0.130997	65.791573	0.123286	0.090000	7.821199
20170623_CFE002	2	101	4	39.254	0.951	11338	0.0158	139.2	9.021	34.054	0.00	174.479	174.645	34.4175	-123.0683	1000-10000	10000	0.166000	35.007206	0.169013	0.090000	7.516438
20170623_CFE001	1	291	4	48.639	0.935	15209	0.0154	141.2	8.837	34.052	-0.06	174.978	175.226	34.4290	-123.0783	1000-10000	10000	0.248001	70.156357	0.119390	0.090000	7.272136
20170623_CFE001	1	294	4	28.084	0.889	12140	0.0116	151	8.611	34.070	-0.03	176.084	176.333	34.4457	-123.0862	1000-10000	10000	0.248993	56.223614	0.133365	0.090000	4.518490
20170625_CFE002	2	113	4	8.485	0.886	3451	0.0076	153.3	8.774	34.072	0.03	176.350	176.514	34.4528	-123.0120	1000-10000	10000	0.164001	10.526995	0.308211	0.090000	2.724386
20170625_CFE002	2	112	4	19.161	0.937	7379	0.0116	155.5	8.779	34.069	0.01	175.966	176.241	34.4463	-123.0076	1000-10000	10000	0.274994	37.742760	0.162773	0.090000	3.563897
20170625_CFE004	4	112	4	4.146	0.791	2708	0.0060	159.3	8.773	34.069	-0.03	175.989	176.266	34.4658	-122.9915	1000-10000	10000	0.277008	13.952560	0.267715	0.090000	1.170989
20170625_CFE002	2	110	4	19.722	0.912	6064	0.0099	161.6	8.660	34.081	-0.01	175.176	175.468	34.4286	-123.0127	1000-10000	10000	0.292007	32.935585	0.174248	0.090000	3.867844
20170625_CFE004	4	110	4	11.530	0.904	7685	0.0168	164.3	8.650	34.079	0.08	175.187	175.486	34.4277	-123.0092	1000-10000	10000	0.298996	42.738785	0.152964	0.090000	2.046307
20170623_CFE004	4	100	4	14.110	0.920	8223	0.0120	190	8.453	34.115	-0.02	174.180	174.367	34.4089	-123.0996	1000-10000	10000	0.187012	28.603075	0.186979	0.090000	2.927991
20170623_CFE001	1	290	4	16.671	0.871	8547	0.0129	259.1	7.608	34.129	0.18	174.618	174.867	34.4146	-123.0832	1000-10000	10000	0.249008	39.585850	0.158939	0.090000	3.044985
20170623_CFE001	1	293	4	71.067	0.946	27353	0.0223	259.5	7.648	34.166	0.06	175.724	175.973	34.4374	-123.0779	1000-10000	10000	0.249008	126.686752	0.088845	0.090000	8.987499
20170623_CFE001	1	292	4	26.640	0.920	13174	0.0196	526.6	5.376	34.238	-0.01	175.340	175.589	34.4356	-123.0798	1000-10000	10000	0.249008	61.016026	0.128020	0.090000	4.168893
20170623_CFE001	1	295	4	4.514	0.959	2441	0.0389	526.6	5.376	34.238	0.00	176.448	176.682	34.4482	-123.0970	1000-10000	10000	0.234009	10.624617	0.306792	0.090000	1.443219
20170623_CFE001	1	289	4	14.695	0.920	6219	0.0273	526.8	5.257	34.224	0.13	174.205	174.483	34.4056	-123.0927	1000-10000	10000	0.278000	32.157204	0.176344	0.090000	2.909358
20170623_CFE004	4	100	4	13.646	0.453	369	0.0005	190	8.453	34.115	-0.02	174.180	174.367	34.4089	-123.0996	>10000	100000	0.187012	1.283538	0.882665	0.090000	12.107297
