# Supplementary material for: Carbon export and fate beneath a dynamic upwelled filament off the California coast
Source: Copernicus journal article supplement (doi:10.5194/bg-18-3053-2021), 2021-05-20
Supplement: Supplementary file 1 [file bg-18-3053-2021-supplement.zip › BG-2020_342_BOURNEetal_NO3averages.csv]

# Supplemental Data. Avraged Nitrate data from CCE-LTER P1706.
# for BG-2020-342_Bourne_etal.
# location - location number as defined in this paper
# avg_no3_umol/L and no3_sd - mean and standard deviation of NO3 (units umol/L)
# count - number of data points averaged
#
location	depth	avg_no3_umol/L	no3_sd	count
1	3.6	6.23	1.87	9
1	8.4	7.56	3.14	5
1	12.5	7.84	3.12	6
1	20.9	10.33	3.45	7
1	27.2	11.75	3.55	5
1	30.0	16.82	0.97	2
1	38.3	16.93	2.28	7
1	49.7	19.23	3.11	7
1	70.0	21.29	4.35	4
2a	3.4	7.69	0.83	5
2a	8.0	7.70	1.22	2
2a	13.0	7.94	0.75	4
2a	19.5	8.74	1.68	4
2a	28.3	13.10	4.44	4
2a	38.3	16.45	5.15	4
2a	49.8	20.49	2.86	4
2a	72.7	25.96	0.47	3
2b	3.4	7.78	0.15	5
2b	8.7	7.81	0.10	3
2b	13.5	7.85	0.19	4
2b	20.8	7.82	0.21	5
2b	26.5	9.50	3.06	4
2b	31.7	9.27	2.14	3
2b	39.0	13.44	6.53	2
2b	49.0	18.21	2.00	5
2b	62.0	21.78	1.95	3
2b	71.5	23.90	0.50	4
3	2.7	1.62	1.53	7
3	11.9	1.97	1.63	7
3	20.6	2.27	1.74	7
3	30.4	2.83	1.76	5
3	42.5	2.52	1.56	6
3	50.5	4.68	1.28	2
3	61.0	3.33	2.38	6
3	74.4	7.97	4.55	7
4	2.4	2.90	0.36	5
4	12.0	3.11	0.75	5
4	20.0	3.70	1.58	5
4	30.2	7.18	4.38	5
4	40.0	12.27	5.38	5
4	49.8	19.05	2.40	5
4	70.0	23.52	0.66	4
